# Supplementary material for: A dual-color ESIPT-based probe for simultaneous detection of hydrogen sulfide and hydrazine
Source: Royal Society of Chemistry journal article supplement (doi:10.1039/d4tb00318g), 2024-01-01
Supplement: d4tb00318g1.pdf [file d4tb00318g1.pdf]

*Supporting Information for*

## **A Dual-Color ESIPT-based Probe for Simultaneous Detection of Hydrogen Sulfide and Hydrazine**

Qian Gong, Youbo Lai, Weiyang Lin,\*

Institute of Optical Materials and Chemical Biology, Guangxi Key Laboratory of  
Electrochemical Energy Materials, School of Chemistry and Chemical Engineering,  
Guangxi University, Nanning, Guangxi 530004, P. R. China.

E-mail: [weiyanglin2013@163.com](mailto:weiyanglin2013@163.com) (W. Lin)

## Table of contents

|                                                            |    |
|------------------------------------------------------------|----|
| 1. Materials and Instrument .....                          | 3  |
| 2. Test solution configuration of the <b>BDM-DNP</b> ..... | 3  |
| 3. Cytotoxicity assay .....                                | 4  |
| 4. Cells fluorescence imaging .....                        | 4  |
| 5. Supporting figures and tables .....                     | 5  |
| Fig. S1 .....                                              | 5  |
| Fig. S2 .....                                              | 6  |
| Fig. S3 .....                                              | 6  |
| Fig. S4 .....                                              | 7  |
| Fig. S5 .....                                              | 7  |
| Fig. S6 .....                                              | 8  |
| Fig. S7 .....                                              | 8  |
| Fig. S8 .....                                              | 9  |
| Fig. S9 .....                                              | 9  |
| Fig. S10 .....                                             | 10 |
| Fig. S11 .....                                             | 10 |
| Fig. S12 .....                                             | 11 |
| Fig. S13 .....                                             | 11 |
| Fig. S14 .....                                             | 12 |
| Fig. S15 .....                                             | 12 |

## 1. Materials and instrument

Common reagents or materials were obtained from commercial suppliers without further purification except as otherwise noted. All experiments used ultra-pure water. The pH measurements were performed with a PHS-3E pH meter. UV-vis absorption spectra were obtained on a Shimadzu UV-2700 spectrophotometer, and fluorescence spectra were measured on a HITACHI F4700 fluorescence spectrophotometer. The fluorescence imaging of cells was performed with a Leica TCS SP8 CARS confocal microscope.  $^1\text{H}$  and  $^{13}\text{C}$  NMR spectra were measured on an AVANCE III HD600 digital NMR spectrometer, using tetramethylsilane (TMS) as the internal reference. High-resolution mass spectrometric (HRMS) analyses were measured on Brooke solanX 70 FT-MS, Agilent 6540T.

## 2. Test solution configuration of the BDM-DNP

Except for special circumstances, all probe solutions, ion solutions, and related solutions required in this article were prepared and used by the following methods. (a) Preparation of **BDM-DNP** reserve solution: 5.9 mg of **BDM-DNP** solid dissolved in 1 mL DMSO solution to prepare reserve solution; (b) Manufacture of **BDM-DNP** test solution: 1.2  $\mu\text{L}$  of the stock solution diluted with DMSO to 1.2 mL, then the diluted solution diluted with PBS buffer to 3 mL to prepare the final test solution required for testing. The final probe was tested at the concentration of 10  $\mu\text{M}$ , and the solution was 60% DMSO and 40% PBS buffer. The spectral properties of the solutions were measured using a Shimadzu UV-2700 spectrophotometer and a HITACHI F4700 fluorescence spectrophotometer.

## 3. Cytotoxicity assay

In vitro, cytotoxicity was measured using the colorimetric methyl thiazolyl tetrazolium (MTT) assay on HeLa cells. Cells were seeded into the 96-well tissue

culture plate in the presence of 100  $\mu$ L Dulbecco's Modified Eagle Medium (DMEM) supplemented with 10% fetal bovine serum (FBS) and 1% penicillin/streptomycin at 37 °C and 5% CO<sub>2</sub> atmosphere for 24h. The cell DMEM medium from each well was replaced with fresh medium containing increasing concentrations of **BDM-DNP**, i.e., 0, 1, 2, 5, 10, 20, 30, and 40  $\mu$ M. Then the cell culture medium was removed and rinsed twice with PBS. Subsequently, 90  $\mu$ L of fresh DMEM medium and 10  $\mu$ L of MTT (5 mg/mL) were added to each well and incubated for 4 h. Absorbance of the solution was measured using a microplate reader. The cell viability was determined by assuming 100% cell viability for cells without **BDM-DNP**.

#### 4. Cells fluorescence imaging

HeLa cells were cultured in Dulbecco's Modified Eagle Medium (DMEM) supplemented with 10% fetal bovine serum (FBS) and 1% streptomycin sulfate and penicillin, incubated at 37°C in a 5% CO<sub>2</sub> environment. For the fluorescence imaging study of exogenous H<sub>2</sub>S and N<sub>2</sub>H<sub>4</sub> in living HeLa cells, we conducted a control experiment, in which the HeLa cells were incubated with 10  $\mu$ M **BDM-DNP** in the culture medium.

To investigate exogenous H<sub>2</sub>S and N<sub>2</sub>H<sub>4</sub> in live cells, three HeLa cell lines were treated with NaHS and N<sub>2</sub>H<sub>4</sub> for imaging studies, respectively, then cultured with **BDM-DNP** (10  $\mu$ M) for 15 minutes. Firstly, 10 mM stock solutions of **BDM-DNP** in DMSO and 100 mM hydrogen sulfide and hydrazine in water were prepared. The first HeLa cell lines were only cultured with **BDM-DNP** (10  $\mu$ M) for 15 minutes. The second cell lines were pretreated with H<sub>2</sub>S and N<sub>2</sub>H<sub>4</sub> (100  $\mu$ M) for 15 minutes and then incubated with **BDM-DNP** (10  $\mu$ M) for 15 minutes. The third cell lines were pretreated with H<sub>2</sub>S and N<sub>2</sub>H<sub>4</sub> (100  $\mu$ M) for 30 minutes before being incubated with **BDM-DNP** (10  $\mu$ M) for 15 minutes.

## 5. Supporting figures and tables

$^1\text{H NMR}$  (600 MHz,  $\text{DMSO-}d_6$ )  $\delta$  11.14 (s, 1H), 10.28 (s, 1H), 7.97 (d,  $J=2.3$  Hz, 1H), 7.88 (dd,  $J=8.7, 2.3$  Hz, 1H), 7.30 (d,  $J=4.7$  Hz, 2H), 7.04 (d,  $J=8.6$  Hz, 1H), 6.86 (s, 1H), 2.60 (s, 2H), 2.53 (s, 2H), 1.01 (s, 6H).

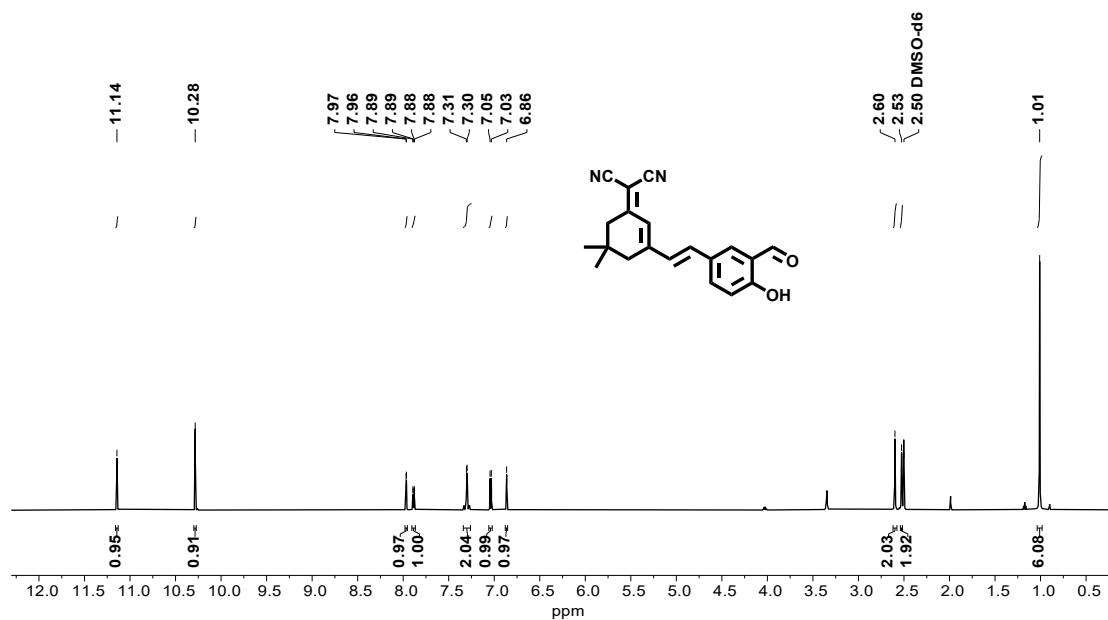

**Fig. S1.**  $^1\text{H NMR}$  (600 MHz,  $\text{DMSO-}d_6$ ) spectrum of compound 2.

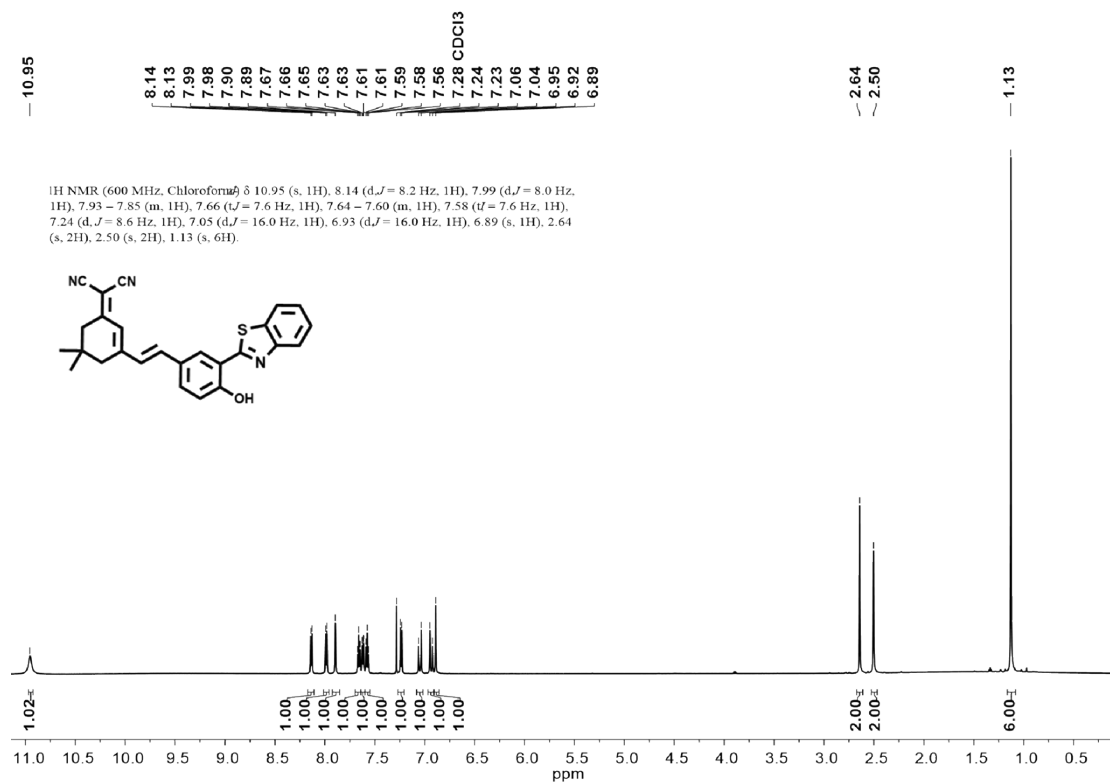

**Fig. S2.** <sup>1</sup>H NMR (600 MHz, Chloroform-*d*) spectrum of **BDM-OH**.

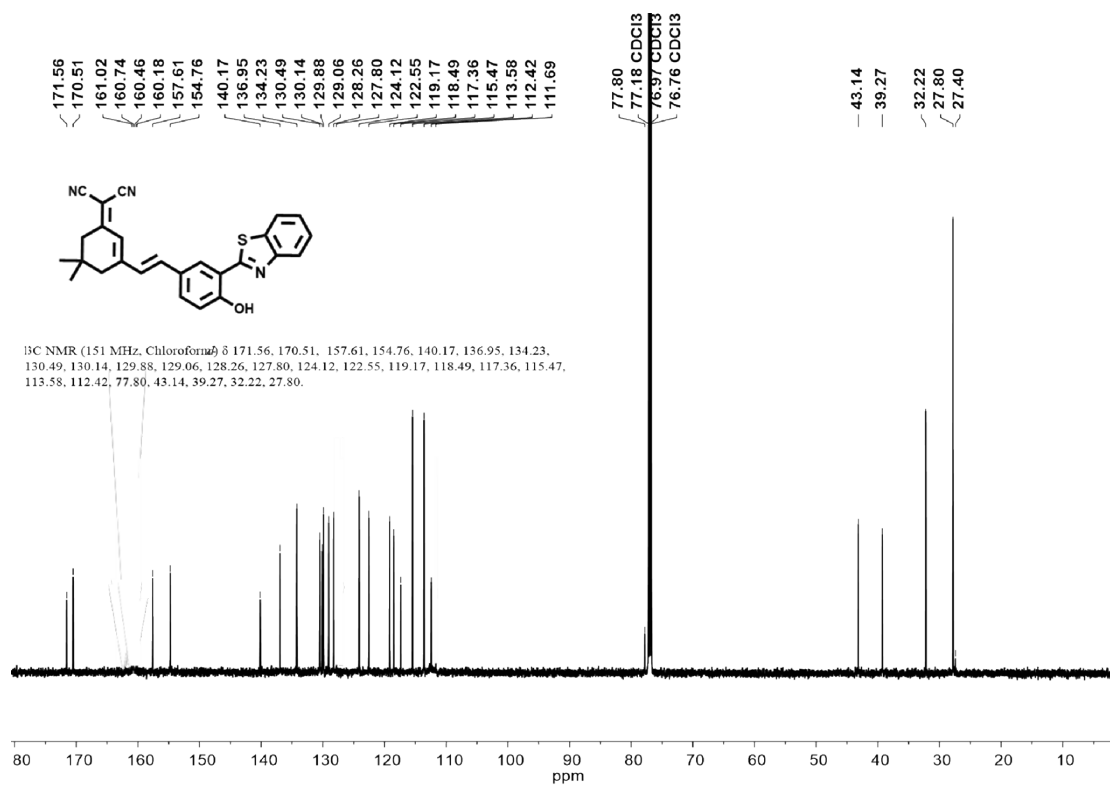

**Fig. S3.** <sup>13</sup>C NMR (151 MHz, Chloroform-*d*) spectrum of **BDM-OH**.

$^1\text{H}$  NMR (600 MHz, Chloroform-*d*)  $\delta$  8.93 (d,  $J$ = 2.6 Hz, 1H), 8.67 (s, 1H), 8.30 (dd,  $J$ = 9.1, 2.7 Hz, 1H), 8.07 (d,  $J$ = 8.2 Hz, 1H), 7.87 (d,  $J$ = 7.5 Hz, 1H), 7.71 (d,  $J$ = 10.5 Hz, 1H), 7.51 (t,  $J$ = 7.9 Hz, 1H), 7.41 (t,  $J$ = 7.6 Hz, 1H), 7.22 (d,  $J$ = 8.4 Hz, 1H), 7.12 (d,  $J$ = 12.8 Hz, 2H), 7.04 (d,  $J$ = 9.2 Hz, 1H), 6.91 (s, 1H), 2.62 (s, 2H), 2.49 (s, 2H), 1.11 (s, 6H).

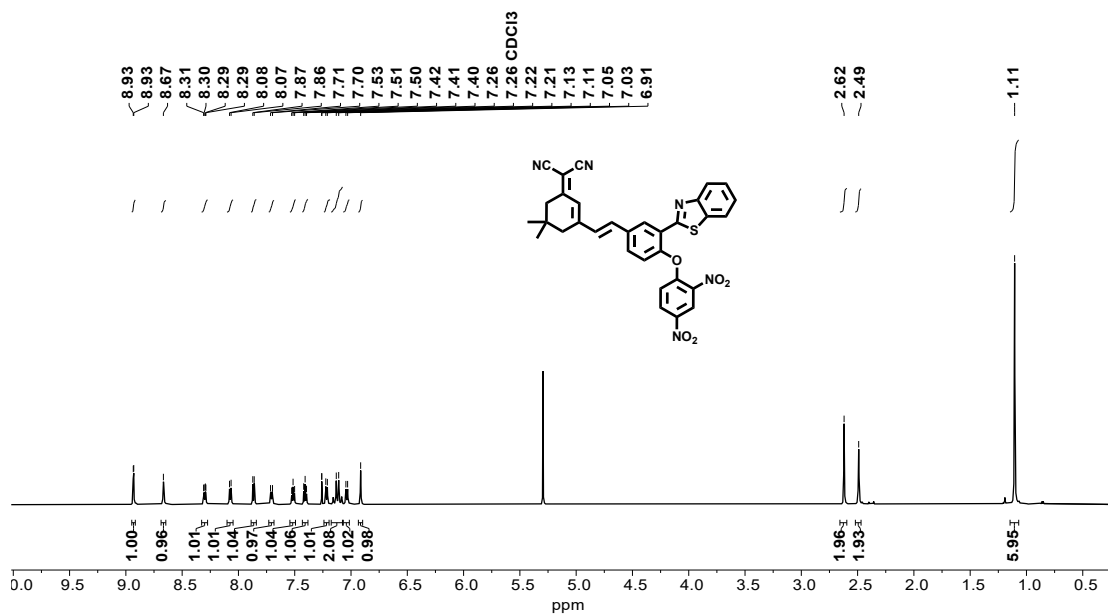

**Fig. S4.**  $^1\text{H}$ NMR (600 MHz, Chloroform-*d*) spectrum of **BDM-DNP**.

$^{13}\text{C}$  NMR (151 MHz, Chloroform-*d*)  $\delta$  160.14, 154.88, 152.85, 152.38, 151.35, 142.31, 134.92, 134.19, 131.15, 130.42, 130.21, 129.14, 126.83, 125.99, 122.14, 121.60, 118.59, 113.23, 112.54, 32.08.

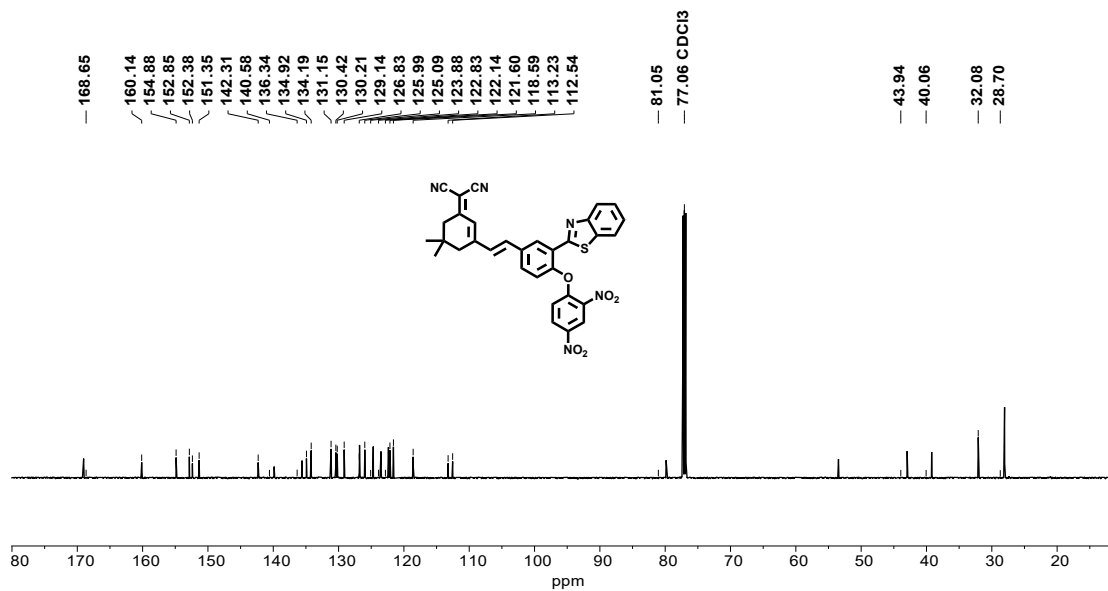

**Fig. S5.**  $^{13}\text{C}$  NMR (151 MHz, Chloroform-*d*) spectrum of **BDM-DNP**.

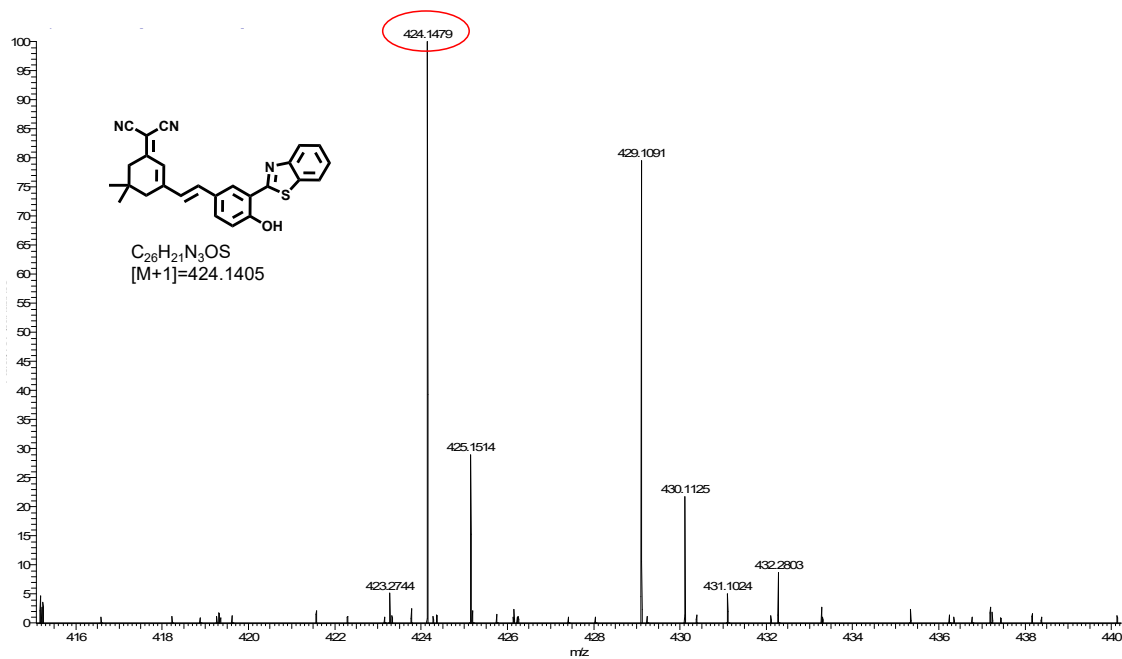

**Fig. S6.** HRMS (ESI) spectrum of **BDM-OH**

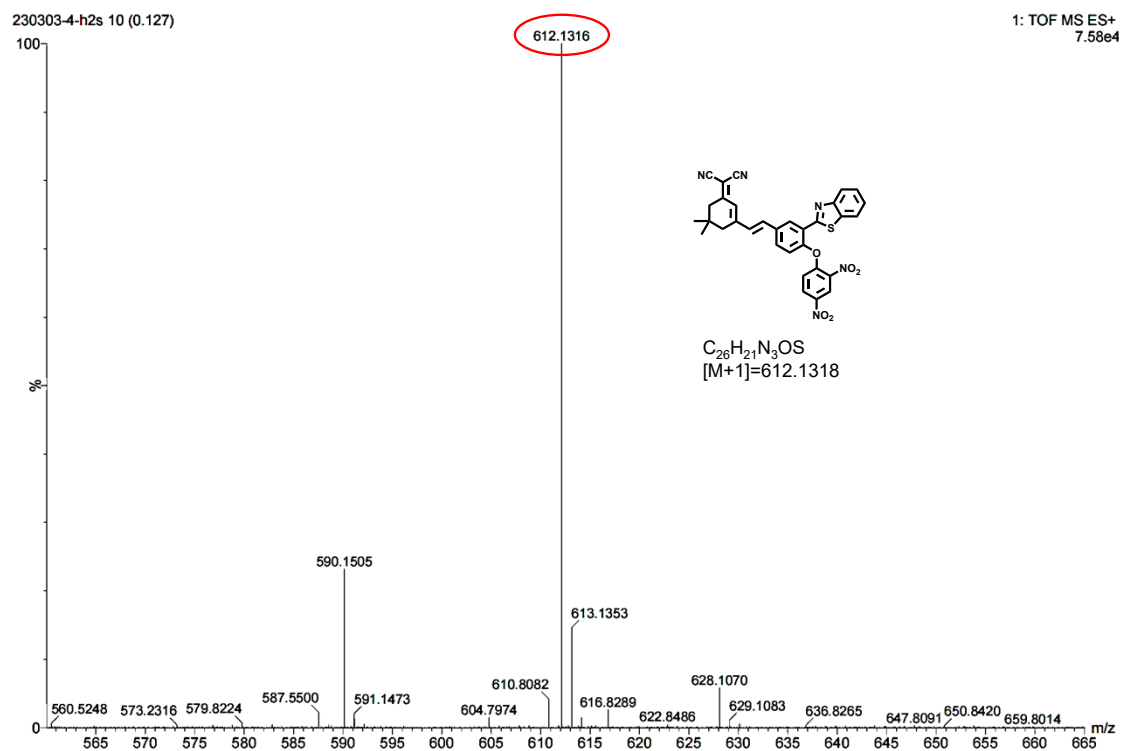

**Fig. S7.** HRMS (ESI) spectrum of **BDM-DNP**.



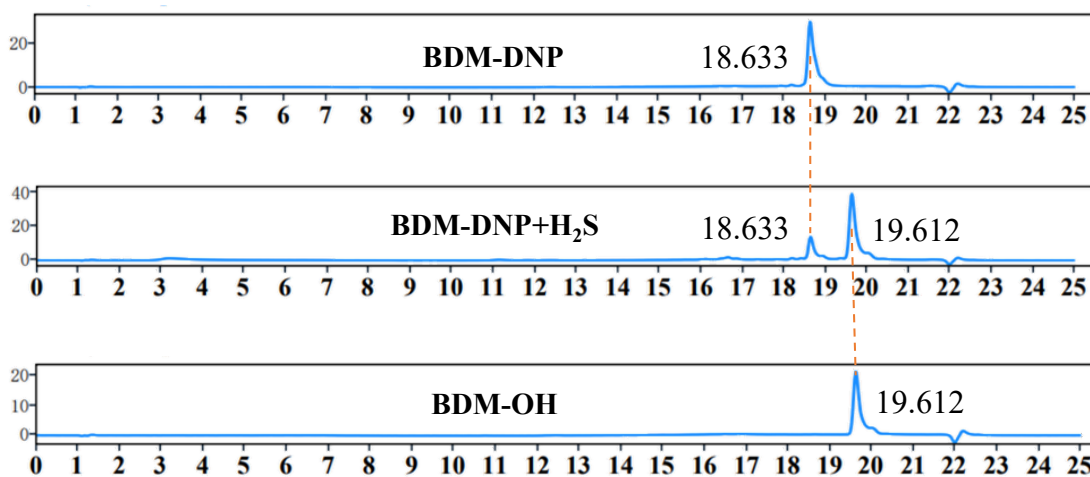

**Fig. S8.** The high-performance liquid chromatography (HPLC) of **BDM-DNP** and **BDM-OH** were tested in 10 mM PBS buffer solution (methyl alcohol: water = 1:9, pH = 7.4). (A) **BDM-DNP**; (B) **BDM-DNP** + H<sub>2</sub>S; (C) **BDM-OH**.

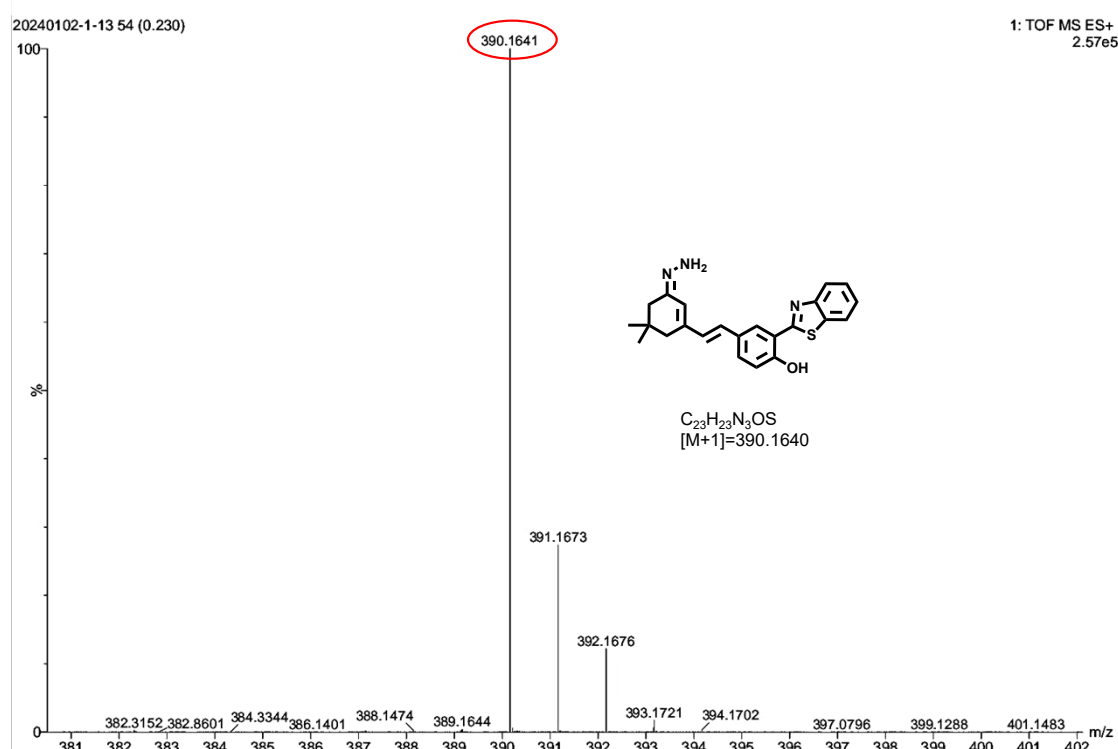

**Fig. S9.** HRMS (ESI) spectra of the reaction of **BDM-DNP** with N<sub>2</sub>H<sub>4</sub>.

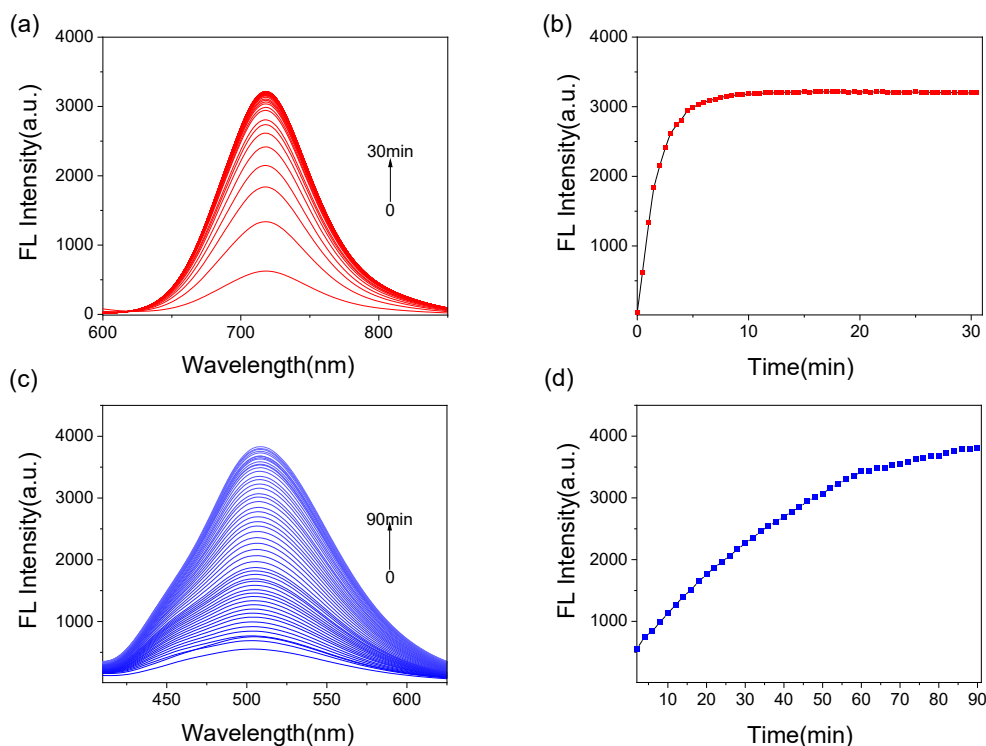

**Fig. S10.** (a) Fluorescence spectra of **BDM-DNP** (10 μM) with 1 mM H<sub>2</sub>S at different times; (b) The response time of **BDM-DNP** with H<sub>2</sub>S at 713 nm; (c) Fluorescence spectra of **BDM-DNP** (10 μM) with 1 mM N<sub>2</sub>H<sub>4</sub> at different time; (d) The response time of **BDM-DNP** with N<sub>2</sub>H<sub>4</sub> at 713 nm.

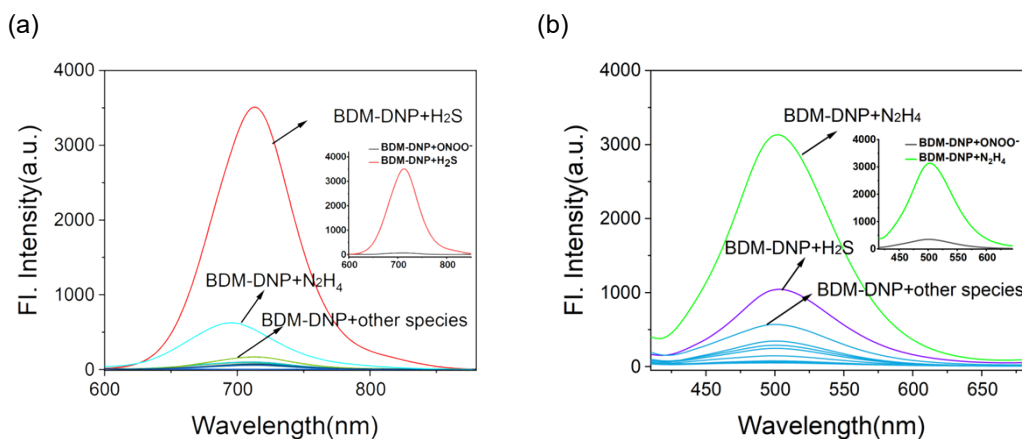

**Fig. S11.** The selectivity of **BDM-DNP** (10 μM) towards diverse relevant analytes (1 mM) against H<sub>2</sub>S (1 mM) (a) and N<sub>2</sub>H<sub>4</sub> (1 mM) (b) in the presence of coexisting analytes (1 mM). Insert: 1.H<sub>2</sub>S; 2. N<sub>2</sub>H<sub>4</sub> 3. Cys; 4. Hcy; 5. GSH; 6. Na<sub>2</sub>S; 7. NaS<sub>2</sub>O<sub>3</sub>; 8. NaSCN; 9. NaCl; 10. NaH<sub>2</sub>PO<sub>4</sub>; 11. NaHCO<sub>3</sub>; 12. NaNO<sub>3</sub>; 13.CH<sub>3</sub>COONa; 14. H<sub>2</sub>O<sub>2</sub>; 15. Gly; 16. Asp; 17.ONOO<sup>-</sup>.

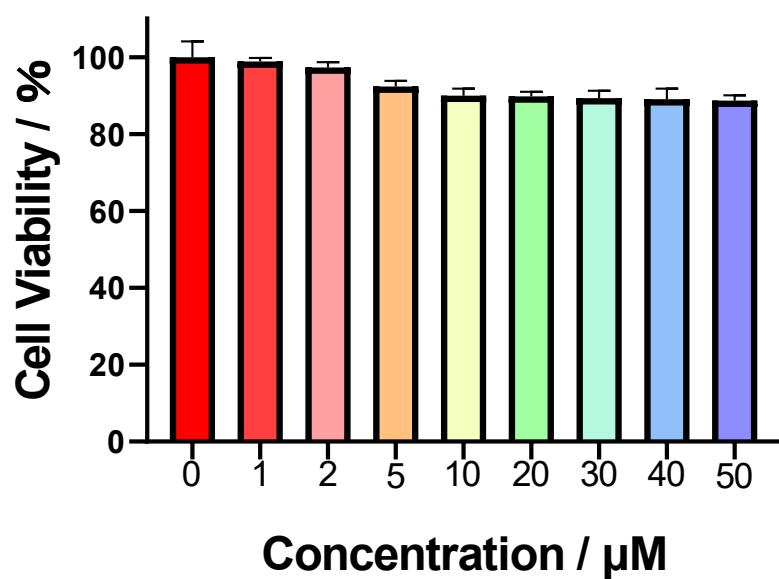

**Fig. S12.** The cytotoxicity of **BDM-DNP** in HeLa cells.

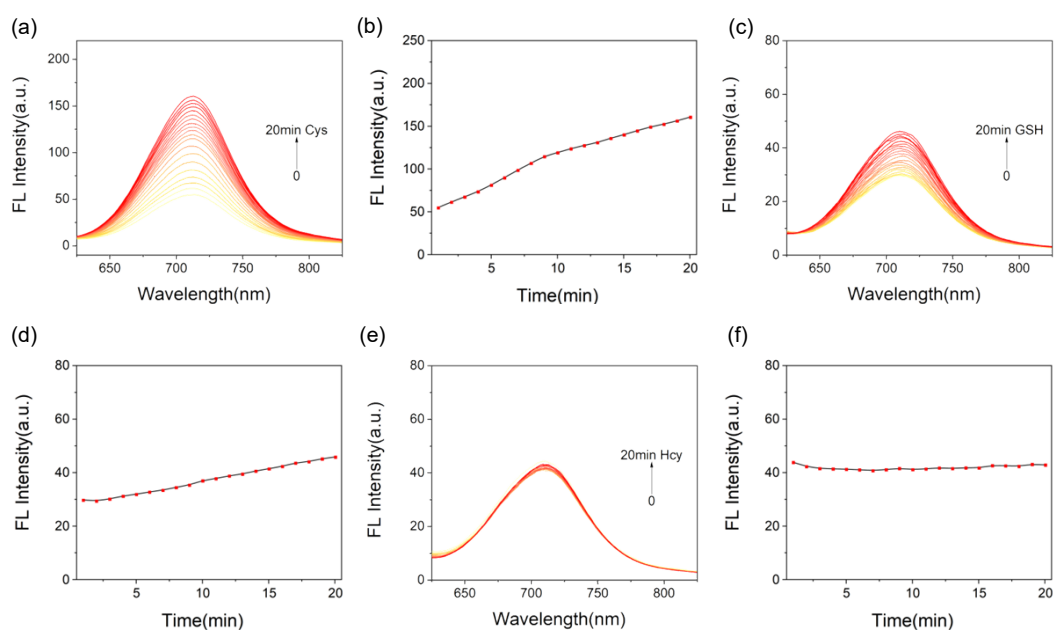

**Fig. S13.** Fluorescence spectra of **BDM-DNP** ( $10 \mu\text{M}$ ) with  $500 \mu\text{M}$  Cys (a),  $500 \mu\text{M}$  GSH (c), and  $500 \mu\text{M}$  Hcy (e) at different times; The response time of **BDM-DNP** with Cys (b), GSH (d) and Hcy (f) at  $713 \text{ nm}$ .

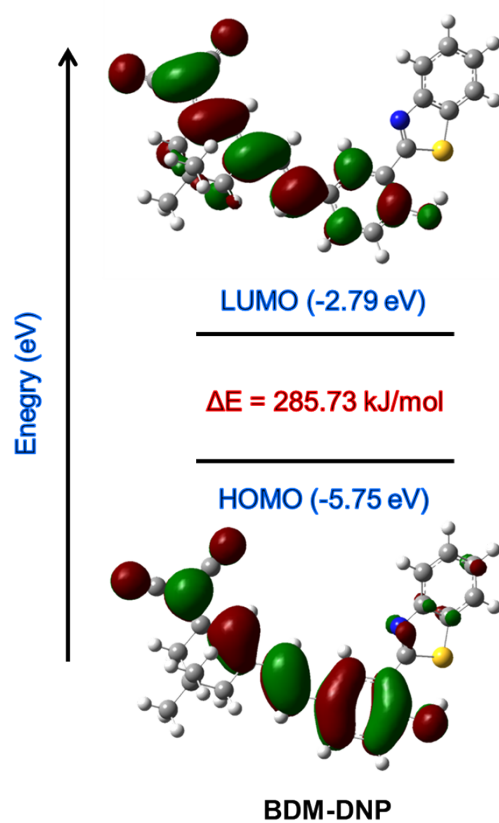

**Fig. S14.** Theoretical calculation of HOMO/LUMO energy for **BDM-DNP**.

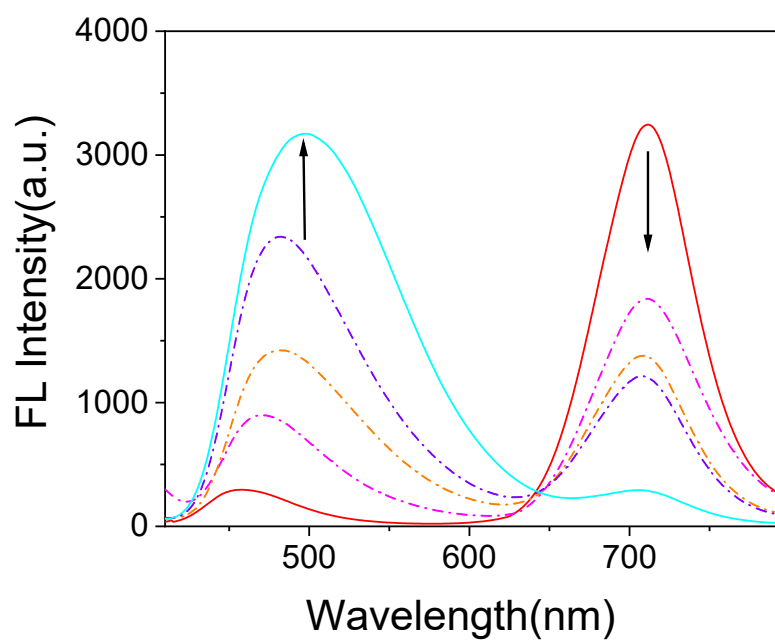

**Fig. S15.** Fluorescence spectra of **BDM-DNP** (10  $\mu\text{M}$ ) coexisting with 1 mM  $\text{H}_2\text{S}$  and 1 mM  $\text{N}_2\text{H}_4$ .
